# Supplementary material for: Caterpillar-induced rice volatiles provide enemy-free space for the offspring of the brown planthopper
Source: eLife. 2020 Aug 11;9:e55421. doi: 10.7554/eLife.55421 (PMC7419140; doi:10.7554/eLife.55421)
Supplement: Figure 2—source data 1. [file elife-55421-fig2-data1.xlsx]

## Sheet: Sheet1
Figrue 2A																（Wilcoxon signed-rank test）Figure 2A
Number of planthoppers settled on uninfested and caterpillar-infested cultivated rice plants																	infested		uninfested
NO.	1h		2h		4h		8h		12h		24h		48h			Time	Mean	SE	Mean	SE	Z	Sig.
	infested	uninfested	infested	uninfested	infested	uninfested	infested	uninfested	infested	uninfested	infested	uninfested	infested	uninfested		1h	8.95	0.223353	3.38	0.223353	-4.044	5.24935e-05
1	10	5	10	5	10	5	9	5	9	6	9	6	8	7		2h	9.43	0.147542	3.85	0.26082	-4.04796	5.16655e-05
2	8	4	9	4	9	5	9	6	9	5	9	5	8	7		4h	9.29	0.171031	3.86	0.269795	-4.037	5.41804e-05
3	9	3	9	3	10	3	10	2	11	2	10	2	7	5		8h	9.33	0.125988	4.19	0.313346	-4.033	5.51114e-05
4	10	3	10	3	10	2	10	2	10	2	9	3	8	3		12h	9.29	0.19691	4.05	0.31979	-4.025	5.68627e-05
5	9	3	9	3	8	4	9	3	8	3	8	3	7	4		24h	8.71	0.219771	4.19	0.375557	-3.891	9.9677e-05
6	8	3	9	3	9	3	9	4	9	3	9	3	9	3		48h	7.76	0.205921	4.95	0.380952	-3.513	0.000442472
7	9	4	9	4	9	5	9	6	9	6	8	6	7	6
8	10	3	10	3	10	3	10	2	9	2	8	3	8	3
9	10	3	9	4	9	3	9	3	9	3	9	3	9	3
10	8	2	9	6	9	6	9	6	9	6	10	4	9	4
11	9	4	10	5	10	4	10	4	10	3	10	3	8	5
12	9	5	10	5	10	3	10	3	9	4	10	3	9	3
13	9	3	10	3	9	4	10	4	9	3	10	4	9	3
14	6	5	8	5	9	5	9	6	9	5	8	7	6	7
15	9	4	9	4	8	4	8	7	8	7	6	9	6	9
16	10	2	10	4	10	2	9	4	9	4	8	4	7	6
17	8	3	9	4	9	5	10	4	10	4	9	6	7	6
18	10	4	9	6	9	6	9	5	9	5	8	3	8	4
19	10	4	11	3	11	2	9	4	12	3	9	3	7	6
20	8	3	10	3	8	4	10	4	9	4	8	4	8	6
21	9	1	9	1	9	3	9	4	9	5	8	4	8	4
Figrue 2B																（Wilcoxon signed-rank test）Figure 2B
Number of planthoppers settled on uninfested and caterpillar-infested wild rice plants																	infested		uninfested
NO.	1h		2h		4h		8h		12h		24h		48h			Time	Mean	SE	Mean	SE	Z	Sig.
	infested	uninfested	infested	uninfested	infested	uninfested	infested	uninfested	infested	uninfested	infested	uninfested	infested	uninfested		1h	8	0.45733	5.16667	0.519238	-2.949	0.00318731
1	8	5	8	6	9	5	9	5	10	4	10	4	12	2		2h	8.66667	0.404226	5.11111	0.403327	-3.322	0.000893564
2	7	4	10	5	10	5	10	5	10	4	10	4	9	4		4h	8.61111	0.458321	5	0.471405	-3.554	0.000379207
3	10	5	10	5	10	3	11	3	11	3	10	3	10	3		8h	8.88889	0.44932	4.72222	0.455938	-3.32	0.000899931
4	9	4	10	4	10	4	10	4	9	5	9	6	6	8		12h	8.83333	0.437237	4.83333	0.451938	-3.208	0.00133753
5	9	5	10	5	10	5	10	5	10	4	10	3	10	3		24h	8.61111	0.362804	4.83333	0.406242	-3.275	0.0010558
6	9	5	9	5	8	5	9	4	8	6	8	6	7	5		48h	8.16667	0.561569	4.94444	0.545164	-2.51	0.0120798
7	8	4	9	4	9	4	9	3	9	4	9	3	8	3
8	6	7	8	5	8	6	8	5	8	5	8	5	8	5
9	8	5	8	5	8	5	9	4	8	5	8	5	7	6
10	8	7	8	7	6	8	6	8	7	8	8	4	3	10
11	9	4	9	4	9	3	9	3	10	3	10	3	11	2
12	9	2	9	3	10	3	10	3	10	3	8	6	8	6
13	9	5	9	5	9	4	10	4	9	4	8	6	10	4
14	7	6	6	7	5	8	6	8	6	8	7	8	6	7
15	12	1	13	1	13	1	12	1	12	1	10	2	10	2
16	4	11	6	8	6	8	9	6	9	6	10	5	10	5
17	4	8	6	8	6	8	4	8	4	8	4	8	4	8
18	8	5	8	5	9	5	9	6	9	6	8	6	8	6
