# Supplementary material for: Caterpillar-induced rice volatiles provide enemy-free space for the offspring of the brown planthopper
Source: eLife. 2020 Aug 11;9:e55421. doi: 10.7554/eLife.55421 (PMC7419140; doi:10.7554/eLife.55421)
Supplement: Figure 2—source data 2. [file elife-55421-fig2-data2.xlsx]

## Sheet: Sheet1
Figrue 2A							Figrue 2B
Number of eggs laid by planthoppers on uninfested and caterpillar-infested cultivated rice plants							Number of eggs laid by planthoppers on uninfested and caterpillar-infested wild rice plants
NO.	lay eggs		Total（ lay eggs）				NO.	lay eggs		Total（ lay eggs）
	infested	uninfested						infested	uninfested
1	445	136	581				1	243	115	358
2	250	176	426				2	316	99	415
3	449	69	518				3	323	69	392
4	313	108	421				4	193	191	384
5	237	77	314				5	302	172	474
6	427	119	546				6	185	170	355
7	368	63	431				7	192	212	404
8	264	106	370				8	230	197	427
9	311	55	366				9	269	130	399
10	256	167	423				10	175	302	477
11	413	127	540				11	292	91	383
12	276	73	349				12	280	50	330
13	329	120	449				13	267	130	397
14	283	93	376				14	154	142	296
15	269	266	535				15	386	46	432
16	288	130	418				16	248	207	455
17	247	59	306				17	121	213	334
18	306	117	423				18	217	140	357
19	312	126	438
20	236	137	373
21	329	107	436
Figrue 2A (Generalized Linear Model (GLM, Poisson distribution error)							Figrue 2B (Generalized Linear Model (GLM, Poisson distribution error)
	Mean	SE	Likelihood Ratio Chi-Square	Sig.				Mean	SE	Likelihood Ratio Chi-Square	Sig.
infested	314.66	16.121	2005.57	<0.001			infested	244.074	17.851	421.245	<0.001
uninfested	115.762	9.778					uninfested	148.695	13.933
