# Supplementary material for: Caterpillar-induced rice volatiles provide enemy-free space for the offspring of the brown planthopper
Source: eLife. 2020 Aug 11;9:e55421. doi: 10.7554/eLife.55421 (PMC7419140; doi:10.7554/eLife.55421)
Supplement: Figure 3—source data 1. [file elife-55421-fig3-data1.xlsx]

## Sheet: Sheet1
Number of females A. nilaparvatae wasps choosing for the odor released from differently treated plants
Figure 3A
Treatment	number of BPH per plant			total (number)	GLM, binomial distribution error	Sig.
SSB：BPH（number）	uninfested plant	infested plant	no response
0:2	40	46	4	90	0.838	0.36
0:5	33	53	9	93	9.388	0.002
0:10	30	63	8	101	23.937	9.95207e-07
1:0	54	32	9	95	11.382	0.001
2:0	52	23	15	90	23.022	1.60168e-06
1:2	58	36	8	102	10.394	0.001
1:5	47	36	7	90	2.924	0.087
1:10	32	53	5	90	10.485	0.001
2:2	64	33	6	101	20.166	7.09922e-06
2:5	57	29	3	89	18.569	1.6385e-05
02:10:00	49	44	9	102	0.538	0.463
Figure 3B
10 : 5	59	24	8	91	30.462	3.40508e-08
1:10 : 5	39	40	11	90	0.025	0.874
2:10 : 5	31	54	5	91	12.604	0.000385
