# Supplementary material for: Caterpillar-induced rice volatiles provide enemy-free space for the offspring of the brown planthopper
Source: eLife. 2020 Aug 11;9:e55421. doi: 10.7554/eLife.55421 (PMC7419140; doi:10.7554/eLife.55421)
Supplement: Figure 5—figure supplement 1—source data 1. — Based on the above results, the 13 volatile compounds that either attracted or repelled the parasitoid were selected for further experiments. For this, we calculated the absolute quantities of the 13 compounds, using the response factors of synthetic versions of these compounds (Kalambet and Kozmin, 2018). Compared to uninfested plants, rice plants that were infested with BPH only, infested with BPH plus SSB, and plants infested with SSB only, showed a consist increase in the release of most of the 13 compounds, but with considerable ratio differences among the treatments (Figure 5—figure supplement 1). [file elife-55421-fig5-figsupp1-data1.xlsx]

## Sheet: Sheet1
Figure5-fig supplement 1 (response factor calculation)
	Compounds	Cx / Cis			R	Note
		1	13	15
Ax / Ais	(E)-2-hexenal	0.337184	4.10093	4.89223	0.3213	R= Response factor; Ax= Area of the compound; Cx= Concentration of the compound; Ais= Area of the internal standard; Cis= Concentration of the internal standard.
	2-heptanol	0.764436	8.71	10.6364	0.6901
	α-pinene	0.72	8.76369	9.99831	0.6654
	D-limonene	0.69	9.10125	10.5479	0.703
	2-nonanone	0.919893	9.91726	10.9649	0.7288
	linalool	0.707962	8.48459	9.3807	0.6294
	DMNT	0.343265	4.77998	5.36485	0.3625
	(E)-2-heptenyl acetate	0.729998	9.26999	11.5146	0.7499
	methyl salicylate	0.429999	5.45999	6.42942	0.4253
	(E)-β-caryophyllene	0.808997	11.0387	12.4408	0.8384
	2-tridecanone	1.09522	13.57	14.9703	1.008
	TMTT	1.17875	13.6464	15.4122	1.0245
	isopropyl myristate	1.23	17.2359	20.3201	1.3532
Figure5-fig supplement 1 (calculation of relative mass of each volatile compound)
	uninfested	10 BPH	2 SSB+10 BPH	2 SSB+5 BPH	2 SSB	Note
(E)-2-hexenal	3.53±0.42	26.37±14.01	125.13±46.82	137.62±42.07	61.52±19.21	Ax= Area of the compound; As= Area of the internal standard; MIS= Mass of the internal standard; N= Number of the plant; h=Number of hour; Relative Mx= Relative amount of the compound emitted/plant/hour.
2-heptanol	6.85±1.55	9.55±3.19	36.36±8.69	48.40±5.83	82.51±19.95
α-pinene	4.89±0.98	14.81±4.94	10.52±2.45	13.20±1.50	14.37±2.95
D-limonene	7.80±2.48	11.06±2.05	36.38±5.18	50.57±5.38	46.12±7.50
2-nonanone	3.43±0.32	3.55±0.86	16.13±3.68	22.81±4.41	34.88±7.82
linalool	58.26±10.61	100.32±36.21	77.78±10.65	94.08±8.86	142.72±20.17
DMNT	0	4.36±0.52	5.77±1.40	6.60±0.69	9.54±1.98
(E)-2-heptenyl acetate	0	0	10.45±1.37	11.45±0.82	14.49±1.66
methyl salicylate	5.75±1.78	7.82±2.88	7.56±1.24	10.95±1.66	18.83±4.05
(E)-β-caryophyllene	1.04±0.13	1.75±0.17	1.99±0.39	3.24±0.48	3.04±0.40
2-tridecanone	0	5.80±1.63	6.37±1.24	10.55±1.88	13.76±2.86
TMTT	0	0	2.95±0.51	2.02±0.36	2.53±0.61
isopropyl myristate	40.88±7.11	62.27±3.08	91.32±12.95	124.74±28.61	117.22±19.12
Figure5-fig supplement 1 (calculation of absolute mass of each volatile compound)
	uninfested	10 BPH	2 SSB+10 BPH	2 SSB+5 BPH	2 SSB	P	Note
(E)-2-hexenal	10.82±1.29	80.84±42.94	383.66±143.55	421.96±129.00	188.62±58.89	<0.001	Mx= Absolute mass of the compound emitted/plant/hour; Relative Mx= Relative amount of the compound emitted/plant/hour. R= Response Factor
2-heptanol	9.66±2.19	13.47±4.50	51.27±12.25	68.26±8.22	116.35±28.14	<0.001
α-pinene	7.34±1.47	22.22±7.41	15.78±3.67	19.80±2.24	21.55±4.42	0.019
D-limonene	11.36±3.52	15.73±2.92	51.73±7.36	71.91±7.64	65.59±10.66	<0.001
2-nonanone	4.69±0.43	4.86±1.18	22.07±5.04	31.20±6.03	47.72±10.70	<0.001
linalool	93.16±16.96	160.41±57.89	124.37±17.03	150.44±14.16	228.21±32.25	0 .025
DMNT	0	12.19±1.46	16.14±3.90	18.45±1.94	26.67±5.54	0 .017
(E)-2-heptenyl acetate	0	0	13.61±1.78	14.92±1.06	18.88±2.15	0 .121
methyl salicylate	13.41±4.13	18.24±6.72	17.64±2.89	25.55±3.87	43.93±9.45	0.037
(E)-β-caryophyllene	1.26±0.16	2.11±0.21	2.40±0.46	3.91±0.57	3.67±0.48	<0.001
2-tridecanone	0	5.81±1.63	6.38±1.24	10.57±1.89	13.78±2.86	0 .032
TMTT	0	0	2.87±0.50	1.97±0.35	2.46±0.59	0 .252
isopropyl myristate	30.18±5.25	45.97±8.32	67.41±9.56	92.08±21.12	86.52±11.89	0 .013
Figure5-fig supplement 1 (Calibration plots of AX/AIS vs CX/CIS, where the response factor is the slope and the y-intercept is assumed to be 0)
