# Supplementary material for: Caterpillar-induced rice volatiles provide enemy-free space for the offspring of the brown planthopper
Source: eLife. 2020 Aug 11;9:e55421. doi: 10.7554/eLife.55421 (PMC7419140; doi:10.7554/eLife.55421)
Supplement: Figure 5—source data 1. [file elife-55421-fig5-data1.xlsx]

## Sheet: Sheet1
Figure 5
		Response of A. nilaparvatae to selected key rice volatile compounds				choice (%)		GLM (binomial distribution error)
NO.	concentration	hexane (ck)	compounds (treament)		no response	ck (%)	treament (%)	Likelihood Ratio Chi-Square	Sig.
1	40ng/10µl	36	8	2-nononene	7	81.8182	18.1818	21.079	<0.0001
	50µg/10µl	42	15		2	73.6842	26.3158	19.14	<0.0001
2	17ng/10µl	34	11	2-tridecanone	5	75.5556	24.4444	21.167	<0.0001
	50µg/10µl	39	18		4	68.4211	31.5789	14.725	<0.0001
3	18ng/10µl	39	17	(E)-2-heptenyl acetate	4	69.6429	30.3571	16.326	<0.0001
	50µg/10µl	28	32		1	46.6667	53.3333	0.533	0.466
4	10ng/10µl	19	14	2-pentadecanone	19	57.5758	42.4242	1.503	0.22
	50µg/10µl	33	30		4	52.381	47.619	0.285	0.593
5	100ng/10µl	27	20	2-heptanol	5	57.4468	42.5532	2.07	0.15
	50µg/10µl	39	18		2	68.4211	31.5789	14.725	<0.0001
6	180ng/10µl	23	19	2-heptanone	8	54.7619	45.2381	0.76	0.383
	50µg/10µl	30	36		5	45.4545	54.5455	1.088	0.297
7	4ng/10µl	23	19	germacrene D	8	54.7619	45.2381	0.76	0.382
	50µg/10µl	43	34		8	55.8442	44.1558	2.094	0.148
8	60ng/10µl	26	22	D-limonene	6	54.1667	45.8333	0.665	0.415
	50µg/10µl	42	25		0	62.6866	37.3134	8.436	0.004
9	16ng/10µl	17	15	Isophorone	18	53.125	46.875	0.25	0.617
	50µg/10µl	29	27		2	51.7857	48.2143	0.143	0.706
10	4ng/10µl	25	22	credol	8	53.1915	46.8085	0.382	0.536
	50µg/10µl	29	30		2	49.1525	50.8475	0.034	0.854
11	10ng/10µl	24	25	2-undecanone	7	48.9796	51.0204	0.041	0.84
	50µg/10µl	33	30		3	52.381	47.619	0.285	0.593
12	6ng/10µl	22	23	α-copaene	6	48.8889	51.1111	0.044	0.833
	50µg/10µl	52	48		0	52	48	0.32	0.572
13	150ng/10µl	18	20	Isopropyl myristate	12	47.3684	52.6316	0.21	0.647
	50µg/10µl	36	20		1	64.2857	35.7143	8.884	0.003
14	18ng/10µl	27	32	α-pinene	4	45.7627	54.2373	0.845	0.358
	50µg/10µl	72	46		4	61.0169	38.9831	11.268	0.001
15	80ng/10µl	30	51	(E)-2-hexenal	8	37.037	62.963	10.637	0.001
	50µg/10µl	22	38		2	36.6667	63.3333	8.324	0.004
16	180ng/10µl	26	50	linalool	3	34.2105	65.7895	14.629	<0.0001
	50µg/10µl	17	40		2	29.8246	70.1754	17.469	<0.0001
17	24ng/10µl	18	37	methyl salicylate	8	32.7273	67.2727	12.372	<0.0001
	50µg/10µl	21	39		2	35	65	10.462	0.001
18	4ng/10µl	16	38	(E)-β-caryophyllene	4	29.6296	70.3704	16.849	<0.0001
	50µg/10µl	20	37		3	35.0877	64.9123	9.827	0.002
19	12ng/10µl	13	41	DMNT	6	24.0741	75.9259	26.045	<0.0001
	50µg/10µl	21	51		3	29.1667	70.8333	23.422	<0.0001
20	3ng/10µl	7	33	TMTT	12	17.5	82.5	27.77	<0.0001
	50µg/10µl	36	19		2	65.4545	34.5455	10.159	0.001
