# Supplementary material for: Caterpillar-induced rice volatiles provide enemy-free space for the offspring of the brown planthopper
Source: eLife. 2020 Aug 11;9:e55421. doi: 10.7554/eLife.55421 (PMC7419140; doi:10.7554/eLife.55421)
Supplement: Figure 6—source data 2. [file elife-55421-fig6-data2.xlsx]

## Sheet: Sheet1
	Figure 6
	Rep.	hexane	synthetic blends emitted as 2 SSB-infested plant	no response			Rep.	hexane	synthetic blends emitted as 10 BPH-infested plant	no response
	2020-04-23	3	2	5			2020-04-23	2	6	2
	2020-04-24	6	2	2			2020-04-24	3	6	1
	2020-04-25	4	2	4			2020-04-25	2	6	2
	2020-04-26	6	3	1			2020-04-26	2	7	1
	2020-04-27	7	2	1			2020-04-27	1	8	1
	2020-04-28	6	3	1			2020-04-28	4	5	1
	TOTAL	32	14	14			TOTAL	14	38	8
	Rep.	hexane	synthetic blends emitted as plant infested with 2 SSB plus 5 BPH	no response			Rep.	hexane	synthetic blends emitted as plant infested with 2 SSB plus 10 BPH	no response
	2020-04-23	4	3	3			2020-04-23	5	2	3
	2020-04-24	6	2	2			2020-04-24	5	5	0
	2020-04-25	5	3	2			2020-04-25	5	4	1
	2020-04-26	6	4	0			2020-04-26	6	3	1
	2020-04-27	6	4	0			2020-04-27	3	5	2
	2020-04-28	5	3	2			2020-04-28	5	5	0
	TOTAL	32	19	9			TOTAL	29	24	7
	Statistical Analyses
	synthetic blends (treament)		Hexane (ck)	no response	treaments (%)	ck (%)	Likelihood Ratio Chi-Square	Sig.
	10 BPH	38	14	8	73.0769	26.9231	23.0162	1.6064e-06
	2 SSB	14	32	14	30.4348	69.5652	14.4705	0.000142374
	2 SSB+5 BPH	19	32	9	37.2549	62.7451	6.70115	0.00963505
	2 SSB+10 BPH	24	29	7	45.283	54.717	1.391	0.331
