# Supplementary material for: Caterpillar-induced rice volatiles provide enemy-free space for the offspring of the brown planthopper
Source: eLife. 2020 Aug 11;9:e55421. doi: 10.7554/eLife.55421 (PMC7419140; doi:10.7554/eLife.55421)
Supplement: Figure 7—source data 1. [file elife-55421-fig7-data1.xlsx]

## Sheet: Sheet1
Figure 7
	Group 1: Parasitization rates of planthopper eggs by A. nilaparvatae in the green house experiments (10 BPH vs 1 SSB + 10 BPH)
NO.	the number of 10 BPH eggs on the health plant	the number of parasitism of BPH eggs	the rate of parasitism of BPH eggs	vs	the number of 10 BPH eggs on 1SSB-infested plant	the number of parasitism of BPH eggs	the rate of parasitism of BPH eggs
1	93	28	0.301075	vs	91	7	0.0769231
2	133	24	0.180451	vs	119	4	0.0336134
3	123	27	0.219512	vs	105	7	0.0666667
4	255	39	0.152941	vs	250	27	0.108
5	120	33	0.275	vs	132	12	0.0909091
6	192	24	0.125	vs	205	7	0.0341463
7	106	28	0.264151	vs	95	15	0.157895
8	160	50	0.3125	vs	172	25	0.145349
9	151	24	0.15894	vs	128	10	0.078125
10	126	31	0.246032	vs	119	18	0.151261
11	141	36	0.255319	vs	160	21	0.13125
12	115	14	0.121739	vs	106	18	0.169811
13	93	18	0.193548	vs	97	10	0.103093
14	192	17	0.0885417	vs	246	13	0.0528455
15	89	13	0.146067	vs	177	24	0.135593
	Group 2: Parasitization rates of planthopper eggs by A. nilaparvatae in the green house experiments (10 BPH vs 2 SSB + 10 BPH)
NO.	the number of 10 BPH eggs on the health plant	the number of parasitism of BPH eggs	the rate of parasitism of BPH eggs	vs	the number of 10 BPH eggs on 2 SSB-infested plant	the number of parasitism of BPH eggs	the rate of parasitism of BPH eggs
1	104	27	0.259615	vs	106	7	0.0660377
2	147	24	0.163265	vs	157	9	0.0573248
3	107	25	0.233645	vs	108	6	0.0555556
4	107	41	0.383178	vs	100	15	0.15
5	140	36	0.257143	vs	157	10	0.0636943
6	144	26	0.180556	vs	137	4	0.0291971
7	199	38	0.190955	vs	205	8	0.0390244
8	112	37	0.330357	vs	136	11	0.0808824
9	103	23	0.223301	vs	95	8	0.0842105
10	137	40	0.291971	vs	143	3	0.020979
11	123	20	0.162602	vs	113	2	0.0176991
12	131	44	0.335878	vs	117	11	0.0940171
13	122	41	0.336066	vs	116	7	0.0603448
14	158	56	0.35443	vs	82	5	0.0609756
	use a LRTest applied on a GLM (Poisson distribution error)
the number of BPH eggs	N	Mean	Std. Error	95% Wald Confidence Interval		Likelihood Ratio Chi-Square	Sig.
				Lower	Upper
10 BPH	15	139.25	3.04685	133.405	145.352	2.97611	0.0845023
10 BPH+1 SSB	15	146.783	3.12818	140.778	153.044
	use a LRTest applied on a GLM (Poisson distribution error)
the number of BPH eggs	N	Mean	Std. Error	95% Wald Confidence Interval		Likelihood Ratio Chi-Square	Sig.
				Lower	Upper
10 BPH	14	131	3.05894	125.14	137.135	1.066	0.302
10 BPH+2 SSB	14	126.571	3.0068	120.813	132.604
	use a LRTest applied on a GLM (binomial distribution error)
the rate of parasitism of BPH eggs	N	Mean	Std. Error	Likelihood Ratio Chi-Square	Sig.
10 BPH	15	0.202721	0.0704411	53.012	<0.0001
10 BPH+1 SSB	15	0.102365	0.0449721
	use a LRTest applied on a GLM (binomial distribution error)
the rate of parasitism of BPH eggs	N	Mean	Std. Error	Likelihood Ratio Chi-Square	Sig.
10 BPH	14	0.2645	0.07509	9.021	0.003
10 BPH+2 SSB	14	0.0629	0.03391
