# Supplementary material for: Caterpillar-induced rice volatiles provide enemy-free space for the offspring of the brown planthopper
Source: eLife. 2020 Aug 11;9:e55421. doi: 10.7554/eLife.55421 (PMC7419140; doi:10.7554/eLife.55421)
Supplement: Figure 8—source data 1. [file elife-55421-fig8-data1.xlsx]

## Sheet: Sheet1
Figure 8
Rep.1	Treatment	Plant no.	Number of BPH eggs	the number of parasitism of BPH eggs	the rate of parasitism of BPH eggs				Number of BPH eggs (GLM, Poisson distribution error)
	without SSB	1	270	51	0.202128				tre.	Mean	Std. Error	Likelihood Ratio Chi-Square	Sig.
		2	294	63
	with SSB	1	504	10	0.0276954				without SSB	454.599	9.53518	1782.05	<0.0001
		2	597	18					with SSB	1275	15.9687
									Covariates appearing in the model are fixed at the following values: VAR00001=3.0000
Rep.2	Treatment	Plant no.	Number of BPH eggs	the number of parasitism of BPH eggs	the rate of parasitism of BPH eggs
	without SSB	1	263	67	0.280936
		2	36	17
	with SSB	1	283	28	0.0609756
		2	1111	57
Rep.3	Treatment	Plant no.	Number of BPH eggs	the number of parasitism of BPH eggs	the rate of parasitism of BPH eggs
	without SSB	1	168	41	0.289125
		2	209	68					the rate of parasitism of BPH eggs (GLM, binomial distribution error)
	with SSB	1	644	25	0.0448895				tre.	Mean	Std. Error	Likelihood Ratio Chi-Square	Sig.
		2	804	40
									without SSB	0.22678	0.00879052	587.849	<0.0001
									with SSB	0.038483	0.00240831
									Covariates appearing in the model are fixed at the following values: VAR00001=3.0000
Rep.4	Treatment	Plant no.	Number of BPH eggs	the number of parasitism of BPH eggs	the rate of parasitism of BPH eggs
	without SSB	1	210	49	0.198058
		2	305	53
	with SSB	1	969	26	0.0285505
		2	397	13
Rep.5	Treatment	Plant no.	Number of BPH eggs	the number of parasitism of BPH eggs	the rate of parasitism of BPH eggs
	without SSB	1	468	102	0.204633
		2	50	4
	with SSB	1	738	22	0.0272045
		2	328	7
